# Supplementary material for: Structures of the human cholecystokinin 1 (CCK1) receptor bound to Gs and Gq mimetic proteins provide insight into mechanisms of G protein selectivity
Source: PLOS journal article supplement (doi:10.1371/journal.pbio.3001295), 2021-06-04
Supplement: S18 (10.1371/journal.pbio.3001295.s018) [file journal.pbio.3001295.s018]

Supp Figure 1F\_LEFT

M L 9.2 9.5 10.1 10.4

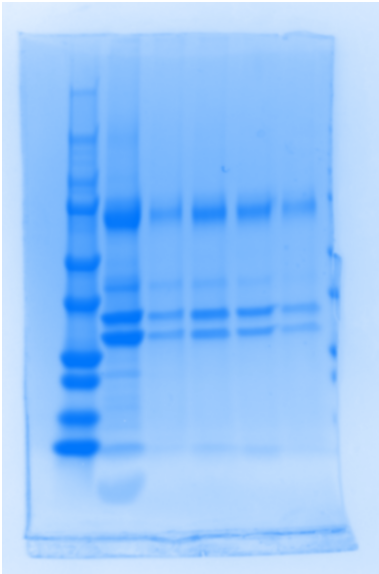

M = Bio-rad precession plus dual protein standards  
L = Sample loaded onto SEC  
# = Volume sample was collected from SEC (ml)

Supp Figure 1F\_RIGHT

8 11.9 C 10.1 M

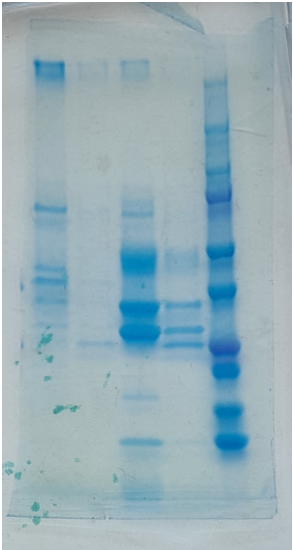

M = Bio-rad precession plus dual protein standards  
C = Concentrated sample after SEC  
# = Volume sample was collected from SEC (ml)

Supp Figure 1H

M FE L 8 10.5 11 11.5 12 12.5 13

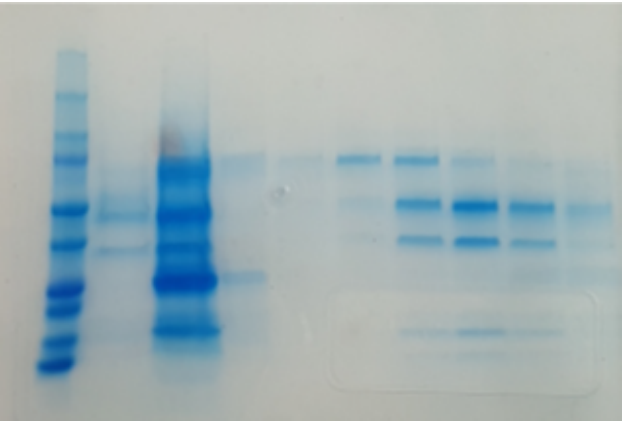

M = Bio-rad precession plus dual protein standards  
FE = Flag elution  
L = Sample loaded onto SEC  
# = Volume sample was collected from SEC (ml)
